# Supplementary material for: Clean surface transfer of graphene films via an effective sandwich method for organic light-emitting diode applications
Source: Royal Society of Chemistry journal article supplement (doi:10.1039/c3tc31722f), 2013-10-17
Supplement: c3tc31722f.pdf [file c3tc31722f.pdf]

## Supporting information

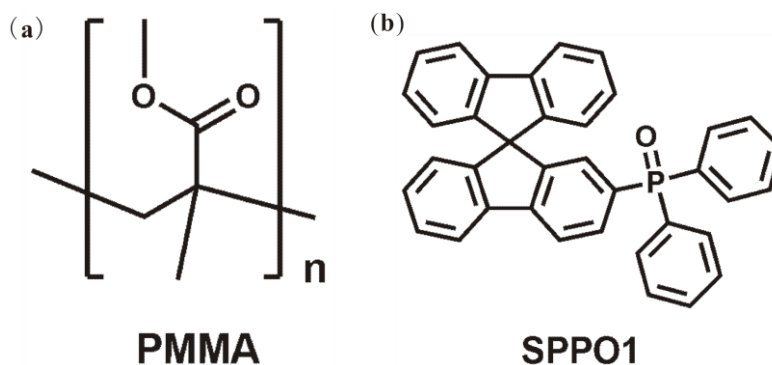

**Figure S1.** The molecular structures of (a) PMMA and (b) SPPO1.

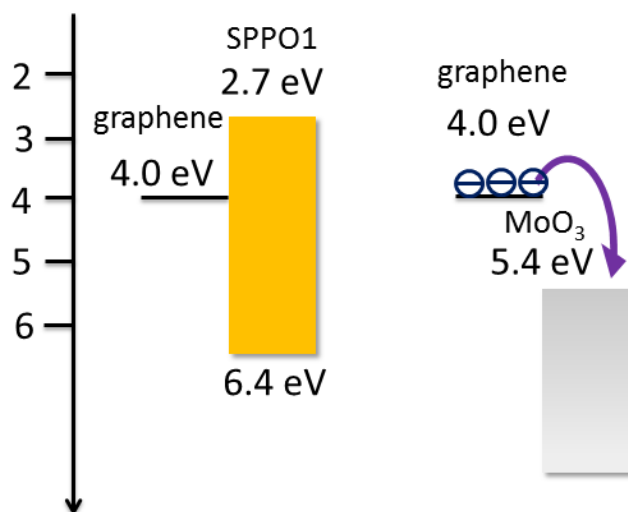

**Figure S2.** Energy band diagram of graphene and SPPO1. The band structure of graphene and MoO<sub>3</sub> is also illustrated for comparison.

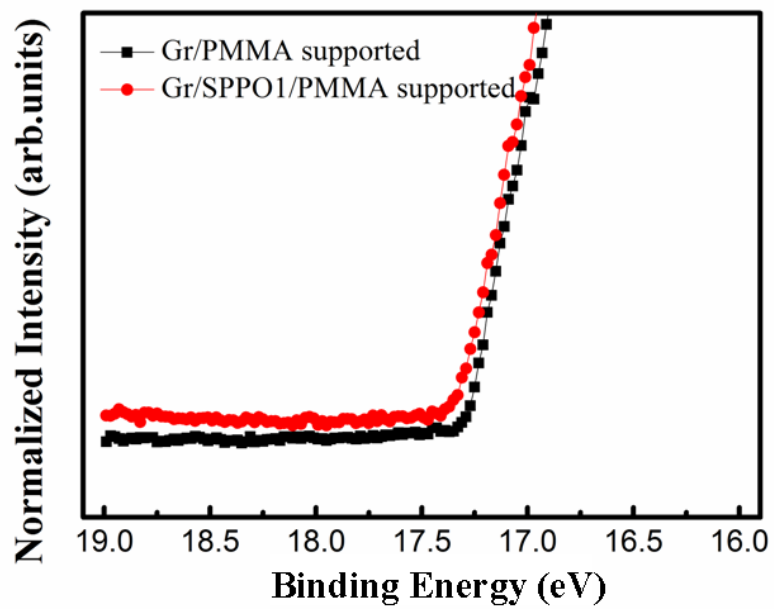

**Figure S3.** UPS spectra of G-P and G-PS.
